# Supplementary material for: Social status and parasitism in male and female vertebrates: a meta-analysis
Source: PubMed Central journal article supplement (PMC5827031; doi:10.1038/s41598-018-21994-7), 2018-02-26
Supplement: 41598_2018_21994_MOESM2_ESM.pdf [file 41598_2018_21994_MOESM2_ESM.pdf]

1                   **Supplementary materials (sample code) for**

2  
3                   **Social status and parasitism in male and female vertebrates: a meta-analysis**

4                   **Bobby Habig\***, Meredith M. Doellman, Kourtney Woods, Jonathan Olansen, and Elizabeth  
5                   **A. Archie**

6  
7                   *Department of Biological Sciences, University of Notre Dame, 100 Galvin Life Sciences Center, Notre*

8                   *Dame, IN 46556, USA*

9                   *\*Corresponding author; e-mail: rhabig@nd.edu*

# Multi-level Meta-analysis in BRMS, All Male Studies

Meredith M. Doellman

February 1, 2018

This code includes the analysis of the full male data set. All other analyses were conducted under the same framework, and can be found along with the associated phylogenies and data sets in our Github repository [https://github.com/mdoellma/social\\_status\\_parasitism\\_meta\\_analysis](https://github.com/mdoellma/social_status_parasitism_meta_analysis). Analyses were performed in R v3.4.0, brms v1.10.2, MCMCglmm v2.25.

Load the required libraries.

```
library(MCMCglmm)
```

```
## Loading required package: Matrix
```

```
## Loading required package: coda
```

```
## Loading required package: ape
```

```
library(brms)
```

```
## Loading required package: Rcpp
```

```
## Loading required package: ggplot2
```

```
## Loading 'brms' package (version 2.1.0). Useful instructions
```

```
## can be found by typing help('brms'). A more detailed introduction
```

```
## to the package is available through vignette('brms_overview').
```

```
## Run theme_set(theme_default()) to use the default bayesplot theme.
```

Load the data and format factors.

```
malesData <- read.table('male.all.txt',header=T,stringsAsFactors=F)
```

```
malesData
```

| yi      | vi       | studyid | taxa           | species                     | setting |
|---------|----------|---------|----------------|-----------------------------|---------|
| 2.3305  | 0.375870 | 13      | Artiodactyla   | Aepyceros_melampus          | wild    |
| -0.4727 | 0.091400 | 26      | Aves           | Agelaius_phoeniceus         | wild    |
| -0.0200 | 0.088900 | 26      | Aves           | Agelaius_phoeniceus         | wild    |
| 0.0000  | 0.151982 | 17      | Squamata       | Anolis_sabanus              | wild    |
| 3.3542  | 0.811641 | 1       | Carnivora      | Arctocephalus_forsteri      | wild    |
| 1.5000  | 0.854200 | 5       | Primates       | Colobus_guereza_kikuyuensis | captive |
| 5.5104  | 3.197000 | 8       | Primates       | Colobus_guereza_kikuyuensis | captive |
| -0.6992 | 0.303200 | 4       | Primates       | Colobus_vellerosus          | wild    |
| 0.0000  | 0.000100 | 21      | Perissodactyla | Equus_quagga                | wild    |
| -1.2676 | 0.108700 | 21      | Perissodactyla | Equus_quagga                | wild    |
| -0.6214 | 0.095500 | 21      | Perissodactyla | Equus_quagga                | wild    |
| -0.5579 | 0.094700 | 21      | Perissodactyla | Equus_quagga                | wild    |
| 0.0800  | 0.091300 | 21      | Perissodactyla | Equus_quagga                | wild    |
| 0.0542  | 0.091300 | 21      | Perissodactyla | Equus_quagga                | wild    |
| -0.8231 | 0.098600 | 21      | Perissodactyla | Equus_quagga                | wild    |
| -0.7363 | 0.097200 | 21      | Perissodactyla | Equus_quagga                | wild    |
| -0.5972 | 0.362736 | 22      | Primates       | Eulemur_fulvus_rufus        | wild    |
| 0.2527  | 0.352281 | 22      | Primates       | Eulemur_fulvus_rufus        | wild    |
| 0.4556  | 0.357413 | 22      | Primates       | Eulemur_fulvus_rufus        | wild    |

| yi      | vi       | studyid | taxa           | species                   | setting |
|---------|----------|---------|----------------|---------------------------|---------|
| 1.0371  | 0.376764 | 22      | Primates       | Eulemur_fulvus_rufus      | wild    |
| -0.3221 | 0.344368 | 22      | Primates       | Eulemur_fulvus_rufus      | wild    |
| 0.1995  | 0.342235 | 22      | Primates       | Eulemur_fulvus_rufus      | wild    |
| -0.3075 | 0.256900 | 25      | Primates       | Lophocebus_albigena       | wild    |
| -0.5113 | 0.262100 | 25      | Primates       | Lophocebus_albigena       | wild    |
| -0.5825 | 0.264600 | 25      | Primates       | Lophocebus_albigena       | wild    |
| 0.2484  | 0.255900 | 25      | Primates       | Lophocebus_albigena       | wild    |
| -0.4079 | 0.259200 | 25      | Primates       | Lophocebus_albigena       | wild    |
| 1.0409  | 0.371181 | 20      | Aves           | Malurus_cyaneus           | wild    |
| 0.0280  | 0.078400 | 18      | Artiodactyla   | Ovis_canadensis           | wild    |
| 1.6225  | 0.241600 | 3       | Primates       | Pan_troglodytes           | wild    |
| 0.3242  | 0.184200 | 3       | Primates       | Pan_troglodytes           | wild    |
| 0.9827  | 0.373600 | 15      | Primates       | Pan_troglodytes           | wild    |
| 0.1388  | 0.148500 | 19      | Primates       | Papio_anubis              | wild    |
| 0.6992  | 0.157200 | 19      | Primates       | Papio_anubis              | wild    |
| 3.6065  | 1.312926 | 6       | Primates       | Papio_cynocephalus        | wild    |
| 2.2323  | 0.844777 | 7       | Primates       | Papio_cynocephalus        | wild    |
| 1.8778  | 0.753709 | 7       | Primates       | Papio_cynocephalus        | wild    |
| -0.3123 | 0.168700 | 11      | Primates       | Papio_cynocephalus        | wild    |
| 0.4591  | 0.171100 | 11      | Primates       | Papio_cynocephalus        | wild    |
| 0.4945  | 0.111400 | 16      | Aves           | Parus_major               | wild    |
| 0.3450  | 0.109700 | 16      | Aves           | Parus_major               | wild    |
| 0.4296  | 0.110600 | 16      | Aves           | Parus_major               | wild    |
| 0.1263  | 0.143100 | 12      | Aves           | Passer_domesticus         | captive |
| 0.4491  | 0.121022 | 10      | Squamata       | Podarcis_melisellensis    | wild    |
| -0.2702 | 0.061757 | 14      | Aves           | Ptilonorhynchus_violaceus | wild    |
| -1.7426 | 0.270600 | 2       | Squamata       | Sceloporus_occidentalis   | wild    |
| 1.1198  | 0.414500 | 24      | Carnivora      | Suricata_suricatta        | wild    |
| 1.1188  | 0.414400 | 24      | Carnivora      | Suricata_suricatta        | wild    |
| -0.0461 | 0.386000 | 24      | Carnivora      | Suricata_suricatta        | wild    |
| -0.1425 | 0.386400 | 24      | Carnivora      | Suricata_suricatta        | wild    |
| 0.0000  | 0.000100 | 24      | Carnivora      | Suricata_suricatta        | wild    |
| -0.0359 | 0.386000 | 24      | Carnivora      | Suricata_suricatta        | wild    |
| 0.5913  | 0.393900 | 24      | Carnivora      | Suricata_suricatta        | wild    |
| 0.1505  | 0.386500 | 24      | Carnivora      | Suricata_suricatta        | wild    |
| -0.2700 | 0.387600 | 24      | Carnivora      | Suricata_suricatta        | wild    |
| 0.7183  | 0.397700 | 24      | Carnivora      | Suricata_suricatta        | wild    |
| 0.8144  | 0.121822 | 23      | Carnivora      | Suricata_suricatta        | wild    |
| 0.6267  | 0.415807 | 23      | Carnivora      | Suricata_suricatta        | wild    |
| 0.9873  | 0.166959 | 23      | Carnivora      | Suricata_suricatta        | wild    |
| 0.2368  | 0.181790 | 23      | Carnivora      | Suricata_suricatta        | wild    |
| 0.1330  | 0.138247 | 23      | Carnivora      | Suricata_suricatta        | wild    |
| -0.1366 | 0.143500 | 23      | Carnivora      | Suricata_suricatta        | wild    |
| 0.4495  | 0.156189 | 23      | Carnivora      | Suricata_suricatta        | wild    |
| 1.5368  | 0.202634 | 9       | Actinopterygii | Symphodus_ocellatus       | captive |
| 0.2563  | 0.394707 | 9       | Actinopterygii | Symphodus_ocellatus       | captive |
| 1.9170  | 0.082500 | 9       | Actinopterygii | Symphodus_ocellatus       | captive |

```

malesData$phylo <- as.factor(malesData$species)
malesData$study <- as.factor(malesData$studyid)
malesData$set <- as.factor(malesData$setting)

```

```
malesData$obs <- 1:nrow(malesData)
```

Load the phylogenetic tree and invert for brms.

```
malesTree <- read.tree("../male.bladj")
inv.males <- MCMCglmm::inverseA(malesTree, nodes = "TIPS", scale = TRUE)
A <- solve(inv.males$Ainv)
rownames(A) <- rownames(inv.males$Ainv)
plot(malesTree, cex=0.7, show.node.label=F, label.offset=2)
```

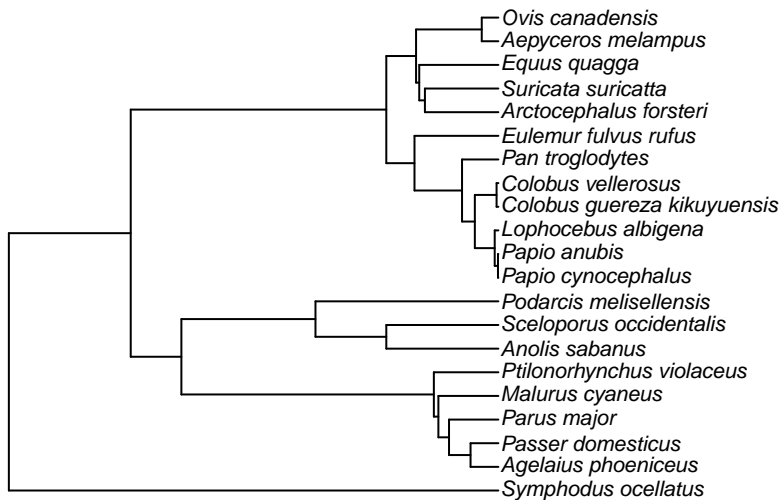

Calculate “typical” measurement error variance as Higgins & Thompson 2002, for use in heterogeneity calculations.

```
malesData$wi <- 1/malesData$vi
s2m <- sum(malesData$wi*(length(malesData$wi)-1))/(sum(malesData$wi)^2-sum(malesData$wi^2))
```

## Model 1

Multi-level meta-analytic model, including study as a random effect.

```
model1 <- brm(yi | se(sqrt(vi)) ~ 1 + (1|study) + (1|obs),
  data = malesData, family = gaussian(),
  prior = c(prior(normal(0, 10), "Intercept"),
    prior(student_t(3, 0, 10), "sd")),
  control = list(adapt_delta = 0.998, max_treedepth = 15),
  chains = 4, cores = 4, iter = 4000, warmup = 1000)
```

```
## Compiling the C++ model
```

```
## Start sampling
```

```
summary(model1)
```

```
## Family: gaussian
## Links: mu = identity; sigma = identity
## Formula: yi | se(sqrt(vi)) ~ 1 + (1 | study) + (1 | obs)
## Data: malesData (Number of observations: 66)
## Samples: 4 chains, each with iter = 4000; warmup = 1000; thin = 1;
## total post-warmup samples = 12000
## ICs: LOO = NA; WAIC = NA; R2 = NA
```

```
##
## Group-Level Effects:
## ~obs (Number of levels: 66)
##           Estimate Est.Error 1-95% CI u-95% CI Eff.Sample Rhat
## sd(Intercept)    0.32     0.09    0.17    0.51     3795 1.00
##
## ~study (Number of levels: 26)
##           Estimate Est.Error 1-95% CI u-95% CI Eff.Sample Rhat
## sd(Intercept)    0.88     0.23    0.49    1.40     2885 1.00
##
## Population-Level Effects:
##           Estimate Est.Error 1-95% CI u-95% CI Eff.Sample Rhat
## Intercept        0.50     0.22    0.11    0.96     2588 1.00
##
## Samples were drawn using sampling(NUTS). For each parameter, Eff.Sample
## is a crude measure of effective sample size, and Rhat is the potential
## scale reduction factor on split chains (at convergence, Rhat = 1).
```

Calculate heterogeneity values, according to Nakagawa & Santos (2012).

```
temp <- as.mcmc(as.data.frame(model1)[,2:3])
total.var <- temp[,2]^2 + temp[,1]^2 + s2m
I2study <- 100*temp[,2]^2/(total.var)
I2units <- 100*temp[,1]^2/(total.var)
I2Tot <- 100*(temp[,2]^2 + temp[,1]^2)/(total.var)
```

Mean and HPD interval for study heterogeneity.

```
c(mean(I2study),HPDinterval(I2study))
```

```
## [1] 85.23101 64.92962 98.74384
```

Mean and HPD interval for residual heterogeneity.

```
c(mean(I2units),HPDinterval(I2units))
```

```
## [1] 13.9747945 0.8787796 33.7987371
```

Mean and HPD interval for total heterogeneity.

```
c(mean(I2Tot),HPDinterval(I2Tot))
```

```
## [1] 99.20581 98.49723 99.76730
```

## Model 2

Multi-level meta-regression model, including study as a random effect and study setting as a moderator.

```
model2 <- brm(yi | se(sqrt(vi)) ~ set + (1|study) + (1|obs),
              data = malesData, family = gaussian(),
              prior = c(prior(normal(0, 10), "Intercept"),
                        prior(student_t(3, 0, 10), "sd")),
              control = list(adapt_delta = 0.998,max_treedepth = 15),
              chains = 4, cores = 4, iter = 4000, warmup = 1000)
```

```
## Compiling the C++ model
```

```
## Start sampling
```

```
summary(model2)
```

```
## Family: gaussian
## Links: mu = identity; sigma = identity
## Formula: yi | se(sqrt(vi)) ~ set + (1 | study) + (1 | obs)
## Data: malesData (Number of observations: 66)
## Samples: 4 chains, each with iter = 4000; warmup = 1000; thin = 1;
##           total post-warmup samples = 12000
## ICs: LOO = NA; WAIC = NA; R2 = NA
##
## Group-Level Effects:
## ~obs (Number of levels: 66)
##           Estimate Est.Error 1-95% CI u-95% CI Eff.Sample Rhat
## sd(Intercept)    0.32     0.09    0.16    0.52     2870 1.00
##
## ~study (Number of levels: 26)
##           Estimate Est.Error 1-95% CI u-95% CI Eff.Sample Rhat
## sd(Intercept)    0.82     0.25    0.39    1.36     2427 1.00
##
## Population-Level Effects:
##           Estimate Est.Error 1-95% CI u-95% CI Eff.Sample Rhat
## Intercept        1.36     0.58    0.25    2.54     6653 1.00
## setwild          -0.97     0.60   -2.20    0.22     6107 1.00
##
## Samples were drawn using sampling(NUTS). For each parameter, Eff.Sample
## is a crude measure of effective sample size, and Rhat is the potential
## scale reduction factor on split chains (at convergence, Rhat = 1).
```

Calculate heterogeneity values, according to Nakagawa & Santos (2012).

```
temp <- as.mcmc(as.data.frame(model2)[,3:4])
total.var <- temp[,2]^2 + temp[,1]^2 + s2m
I2study <- 100*temp[,2]^2/(total.var)
I2units <- 100*temp[,1]^2/(total.var)
I2Tot <- 100*(temp[,2]^2 + temp[,1]^2)/(total.var)
```

Mean and HPD interval for study heterogeneity.

```
c(mean(I2study),HPDinterval(I2study))
```

```
## [1] 82.66465 54.86297 98.56791
```

Mean and HPD interval for residual heterogeneity.

```
c(mean(I2units),HPDinterval(I2units))
```

```
## [1] 16.4221535 0.4870039 43.1457976
```

Mean and HPD interval for total heterogeneity.

```
c(mean(I2Tot),HPDinterval(I2Tot))
```

```
## [1] 99.08680 98.14848 99.75683
```

### Model 3

Multi-level meta-analytic model, including study and species as random effects.

```

model3 <- brm(yi | se(sqrt(vi)) ~ 1 + (1|study) + (1|species) + (1|obs),
  data = malesData, family = gaussian(),
  prior = c(prior(normal(0, 10), "Intercept"),
    prior(student_t(3, 0, 10), "sd")),
  control = list(adapt_delta = 0.998,max_treedepth = 15),
  chains = 4, cores = 4, iter = 4000, warmup = 1000)

```

```
## Compiling the C++ model
```

```
## Start sampling
```

```
summary(model3)
```

```

## Family: gaussian
## Links: mu = identity; sigma = identity
## Formula: yi | se(sqrt(vi)) ~ 1 + (1 | study) + (1 | species) + (1 | obs)
## Data: malesData (Number of observations: 66)
## Samples: 4 chains, each with iter = 4000; warmup = 1000; thin = 1;
## total post-warmup samples = 12000
## ICs: LOO = NA; WAIC = NA; R2 = NA
##
## Group-Level Effects:
## ~obs (Number of levels: 66)
## Estimate Est.Error 1-95% CI u-95% CI Eff.Sample Rhat
## sd(Intercept) 0.32 0.09 0.17 0.51 4977 1.00
##
## ~species (Number of levels: 21)
## Estimate Est.Error 1-95% CI u-95% CI Eff.Sample Rhat
## sd(Intercept) 0.57 0.32 0.04 1.22 1759 1.00
##
## ~study (Number of levels: 26)
## Estimate Est.Error 1-95% CI u-95% CI Eff.Sample Rhat
## sd(Intercept) 0.65 0.31 0.06 1.27 1701 1.00
##
## Population-Level Effects:
## Estimate Est.Error 1-95% CI u-95% CI Eff.Sample Rhat
## Intercept 0.46 0.23 0.02 0.94 6046 1.00
##
## Samples were drawn using sampling(NUTS). For each parameter, Eff.Sample
## is a crude measure of effective sample size, and Rhat is the potential
## scale reduction factor on split chains (at convergence, Rhat = 1).

```

Calculate heterogeneity values, according to Nakagawa & Santos (2012).

```

temp <- as.mcmc(as.data.frame(model3)[,2:4])
total.var <- temp[,3]^2 + temp[,2]^2 + temp[,1]^2 + s2m
I2study <- 100*temp[,3]^2/(total.var)
I2species <- 100*temp[,2]^2/(total.var)
I2units <- 100*temp[,1]^2/(total.var)
I2Tot <- 100*(temp[,3]^2 + temp[,2]^2 + temp[,1]^2)/(total.var)

```

Mean and HPD interval for study heterogeneity.

```
c(mean(I2study),HPDinterval(I2study))
```

```
## [1] 4.739831e+01 7.732558e-06 9.029739e+01
```

Mean and HPD interval for species heterogeneity.

```
c(mean(I2species),HPDinterval(I2species))
```

```
## [1] 3.938687e+01 1.827629e-08 8.563477e+01
```

Mean and HPD interval for residual heterogeneity.

```
c(mean(I2units),HPDinterval(I2units))
```

```
## [1] 12.4979225 0.8785268 30.5248067
```

Mean and HPD interval for total heterogeneity.

```
c(mean(I2Tot),HPDinterval(I2Tot))
```

```
## [1] 99.28310 98.61237 99.81866
```

## Model 4

Multi-level meta-regression model, including study and species as random effects and study setting as a moderator.

```
model4 <- brm(yi | se(sqrt(vi)) ~ set + (1|study) + (1|species) + (1|obs),
              data = malesData, family = gaussian(),
              prior = c(prior(normal(0, 10), "Intercept"),
                       prior(student_t(3, 0, 10), "sd")),
              control = list(adapt_delta = 0.998,max_treedepth = 15),
              chains = 4, cores = 4, iter = 4000, warmup = 1000)
```

```
## Compiling the C++ model
```

```
## Start sampling
```

```
summary(model4)
```

```
## Family: gaussian
## Links: mu = identity; sigma = identity
## Formula: yi | se(sqrt(vi)) ~ set + (1 | study) + (1 | species) + (1 | obs)
## Data: malesData (Number of observations: 66)
## Samples: 4 chains, each with iter = 4000; warmup = 1000; thin = 1;
##          total post-warmup samples = 12000
##          ICs: LOO = NA; WAIC = NA; R2 = NA
##
## Group-Level Effects:
## ~obs (Number of levels: 66)
##           Estimate Est.Error 1-95% CI u-95% CI Eff.Sample Rhat
## sd(Intercept)    0.32      0.09    0.17    0.51      4871 1.00
##
## ~species (Number of levels: 21)
##           Estimate Est.Error 1-95% CI u-95% CI Eff.Sample Rhat
## sd(Intercept)    0.53      0.30    0.03    1.16      2660 1.00
##
## ~study (Number of levels: 26)
##           Estimate Est.Error 1-95% CI u-95% CI Eff.Sample Rhat
## sd(Intercept)    0.61      0.31    0.06    1.24      2013 1.00
##
## Population-Level Effects:
```



```
##           Estimate Est.Error 1-95% CI u-95% CI Eff.Sample Rhat
## Intercept      1.30      0.61    0.14    2.53     12000 1.00
## setwild       -0.97      0.64   -2.26    0.31     11311 1.00
##
## Samples were drawn using sampling(NUTS). For each parameter, Eff.Sample
## is a crude measure of effective sample size, and Rhat is the potential
## scale reduction factor on split chains (at convergence, Rhat = 1).
```

Calculate heterogeneity values, according to Nakagawa & Santos (2012).

```
temp <- as.mcmc(as.data.frame(model4)[,3:5])
total.var <- temp[,3]^2 + temp[,2]^2 + temp[,1]^2 + s2m
I2study <- 100*temp[,3]^2/(total.var)
I2species <- 100*temp[,2]^2/(total.var)
I2units <- 100*temp[,1]^2/(total.var)
I2Tot <- 100*(temp[,3]^2 + temp[,2]^2 + temp[,1]^2)/(total.var)
```

Mean and HPD interval for study heterogeneity.

```
c(mean(I2study),HPDinterval(I2study))
```

```
## [1] 4.631071e+01 1.089749e-04 9.009240e+01
```

Mean and HPD interval for species heterogeneity.

```
c(mean(I2species),HPDinterval(I2species))
```

```
## [1] 3.823645e+01 1.085320e-05 8.396771e+01
```

Mean and HPD interval for residual heterogeneity.

```
c(mean(I2units),HPDinterval(I2units))
```

```
## [1] 14.6315412 0.6364677 37.4402561
```

Mean and HPD interval for total heterogeneity.

```
c(mean(I2Tot),HPDinterval(I2Tot))
```

```
## [1] 99.1787 98.3795 99.8093
```

## Model 5

Multi-level meta-analytic model, including study, species and phylogeny as random effects.

```
model5 <- brm(yi | se(sqrt(vi)) ~ 1 + (1|study) + (1|species) + (1|phylo) + (1|obs),
  data = malesData, family = gaussian(),
  cov_ranef = list(phylo = A),
  prior = c(prior(normal(0, 10), "Intercept"),
    prior(student_t(3, 0, 10), "sd")),
  control = list(adapt_delta = 0.998,max_treedepth = 15),
  chains = 4, cores = 4, iter = 4000, warmup = 1000)
```

```
## Compiling the C++ model
```

```
## Start sampling
```

```
summary(model5)
```

```
## Family: gaussian
```

```
## Links: mu = identity; sigma = identity
```

```

## Formula: yi | se(sqrt(vi)) ~ 1 + (1 | study) + (1 | species) + (1 | phylo) + (1 | obs)
## Data: malesData (Number of observations: 66)
## Samples: 4 chains, each with iter = 4000; warmup = 1000; thin = 1;
## total post-warmup samples = 12000
## ICs: LOO = NA; WAIC = NA; R2 = NA
##
## Group-Level Effects:
## ~obs (Number of levels: 66)
## Estimate Est.Error 1-95% CI u-95% CI Eff.Sample Rhat
## sd(Intercept) 0.32 0.09 0.17 0.51 3794 1.00
##
## ~phylo (Number of levels: 21)
## Estimate Est.Error 1-95% CI u-95% CI Eff.Sample Rhat
## sd(Intercept) 0.60 0.47 0.02 1.77 3249 1.00
##
## ~species (Number of levels: 21)
## Estimate Est.Error 1-95% CI u-95% CI Eff.Sample Rhat
## sd(Intercept) 0.53 0.31 0.03 1.18 1860 1.00
##
## ~study (Number of levels: 26)
## Estimate Est.Error 1-95% CI u-95% CI Eff.Sample Rhat
## sd(Intercept) 0.64 0.31 0.06 1.28 1703 1.00
##
## Population-Level Effects:
## Estimate Est.Error 1-95% CI u-95% CI Eff.Sample Rhat
## Intercept 0.48 0.52 -0.56 1.60 5302 1.00
##
## Samples were drawn using sampling(NUTS). For each parameter, Eff.Sample
## is a crude measure of effective sample size, and Rhat is the potential
## scale reduction factor on split chains (at convergence, Rhat = 1).

```

Calculate heterogeneity values, according to Nakagawa & Santos (2012).

```

temp <- as.mcmc(as.data.frame(model5)[,2:5])
total.var <- temp[,4]^2 + temp[,3]^2 + temp[,2]^2 + temp[,1]^2 + s2m
I2study <- 100*temp[,4]^2/(total.var)
I2species <- 100*temp[,3]^2/(total.var)
I2phylo <- 100*temp[,2]^2/(total.var)
I2units <- 100*temp[,1]^2/(total.var)
I2Tot <- 100*(temp[,4]^2 + temp[,3]^2 + temp[,2]^2 + temp[,1]^2)/(total.var)

```

Mean and HPD interval for study heterogeneity.

```
c(mean(I2study),HPDinterval(I2study))
```

```
## [1] 3.571587e+01 5.669157e-06 8.179713e+01
```

Mean and HPD interval for species heterogeneity.

```
c(mean(I2species),HPDinterval(I2species))
```

```
## [1] 2.662872e+01 1.572625e-05 7.335635e+01
```

Mean and HPD interval for species heterogeneity.

```
c(mean(I2phylo),HPDinterval(I2phylo))
```

```
## [1] 2.785925e+01 3.393946e-07 7.527218e+01
```

Mean and HPD interval for residual heterogeneity.

```
c(mean(I2units),HPDinterval(I2units))
```

```
## [1] 9.265998 0.562410 24.489617
```

Mean and HPD interval for total heterogeneity.

```
c(mean(I2Tot),HPDinterval(I2Tot))
```

```
## [1] 99.46984 98.91546 99.91163
```

## Model 6

Multi-level meta-regression model, including study, species and phylogeny as random effects and study setting as a moderator.

```
model6 <- brm(yi | se(sqrt(vi)) ~ set + (1|study) + (1|species) + (1|phylo) + (1|obs),
              data = malesData, family = gaussian(),
              cov_ranef = list(phylo = A),
              prior = c(prior(normal(0, 10), "Intercept"),
                       prior(student_t(3, 0, 10), "sd")),
              control = list(adapt_delta = 0.998,max_treedepth = 15),
              chains = 4, cores = 4, iter = 4000, warmup = 1000)
```

```
## Compiling the C++ model
```

```
## Start sampling
```

```
summary(model6)
```

```
## Family: gaussian
## Links: mu = identity; sigma = identity
## Formula: yi | se(sqrt(vi)) ~ set + (1 | study) + (1 | species) + (1 | phylo) + (1 | obs)
## Data: malesData (Number of observations: 66)
## Samples: 4 chains, each with iter = 4000; warmup = 1000; thin = 1;
##          total post-warmup samples = 12000
##          ICs: LOO = NA; WAIC = NA; R2 = NA
##
## Group-Level Effects:
## ~obs (Number of levels: 66)
##           Estimate Est.Error 1-95% CI u-95% CI Eff.Sample Rhat
## sd(Intercept)    0.32      0.09    0.17    0.50     4838 1.00
##
## ~phylo (Number of levels: 21)
##           Estimate Est.Error 1-95% CI u-95% CI Eff.Sample Rhat
## sd(Intercept)    0.58      0.46    0.02    1.74     3610 1.00
##
## ~species (Number of levels: 21)
##           Estimate Est.Error 1-95% CI u-95% CI Eff.Sample Rhat
## sd(Intercept)    0.51      0.31    0.03    1.16     2251 1.00
##
## ~study (Number of levels: 26)
##           Estimate Est.Error 1-95% CI u-95% CI Eff.Sample Rhat
## sd(Intercept)    0.62      0.31    0.05    1.25     1488 1.00
##
## Population-Level Effects:
```

```
##           Estimate Est.Error l-95% CI u-95% CI Eff.Sample Rhat
## Intercept      1.30      0.75   -0.20    2.85      7442 1.00
## setwild       -1.04      0.71   -2.50    0.33      7520 1.00
##
## Samples were drawn using sampling(NUTS). For each parameter, Eff.Sample
## is a crude measure of effective sample size, and Rhat is the potential
## scale reduction factor on split chains (at convergence, Rhat = 1).
```

Calculate heterogeneity values, according to Nakagawa & Santos (2012).

```
temp <- as.mcmc(as.data.frame(model6)[,3:6])
total.var <- temp[,4]^2 + temp[,3]^2 + temp[,2]^2 + temp[,1]^2 + s2m
I2study <- 100*temp[,4]^2/(total.var)
I2species <- 100*temp[,3]^2/(total.var)
I2phylo <- 100*temp[,2]^2/(total.var)
I2units <- 100*temp[,1]^2/(total.var)
I2Tot <- 100*(temp[,4]^2 + temp[,3]^2 + temp[,2]^2 + temp[,1]^2)/(total.var)
```

Mean and HPD interval for study heterogeneity.

```
c(mean(I2study),HPDinterval(I2study))
## [1] 3.514929e+01 8.294635e-07 8.003261e+01
```

Mean and HPD interval for species heterogeneity.

```
c(mean(I2species),HPDinterval(I2species))
## [1] 2.626756e+01 2.800581e-06 7.294572e+01
```

Mean and HPD interval for species heterogeneity.

```
c(mean(I2phylo),HPDinterval(I2phylo))
## [1] 2.790903e+01 1.801154e-07 7.623098e+01
```

Mean and HPD interval for residual heterogeneity.

```
c(mean(I2units),HPDinterval(I2units))
## [1] 10.0958340 0.3187851 26.9829771
```

Mean and HPD interval for total heterogeneity.

```
c(mean(I2Tot),HPDinterval(I2Tot))
## [1] 99.42172 98.75954 99.90567
```

Conduct K-fold cross-validation for each model, with K=10.

```
k1 <- kfold(model1,K=10)
## Fitting model 1 out of 10
## The desired updates require recompiling the model
## Start sampling
## Fitting model 2 out of 10
## The desired updates require recompiling the model
## Start sampling
## Fitting model 3 out of 10
```

```
## The desired updates require recompiling the model
## Start sampling
## Fitting model 4 out of 10
## The desired updates require recompiling the model
## Start sampling
## Fitting model 5 out of 10
## The desired updates require recompiling the model
## Start sampling
## Fitting model 6 out of 10
## The desired updates require recompiling the model
## Start sampling
## Fitting model 7 out of 10
## The desired updates require recompiling the model
## Start sampling
## Fitting model 8 out of 10
## The desired updates require recompiling the model
## Start sampling
## Fitting model 9 out of 10
## The desired updates require recompiling the model
## Start sampling
## Fitting model 10 out of 10
## The desired updates require recompiling the model
## Start sampling
k2 <- kfold(model2,K=10)
## Fitting model 1 out of 10
## The desired updates require recompiling the model
## Start sampling
## Fitting model 2 out of 10
## The desired updates require recompiling the model
## Start sampling
## Fitting model 3 out of 10
## The desired updates require recompiling the model
## Start sampling
## Fitting model 4 out of 10
## The desired updates require recompiling the model
## Start sampling
```

```
## Fitting model 5 out of 10
## The desired updates require recompiling the model
## Start sampling
## Fitting model 6 out of 10
## The desired updates require recompiling the model
## Start sampling
## Fitting model 7 out of 10
## The desired updates require recompiling the model
## Start sampling
## Fitting model 8 out of 10
## The desired updates require recompiling the model
## Start sampling
## Fitting model 9 out of 10
## The desired updates require recompiling the model
## Start sampling
## Fitting model 10 out of 10
## The desired updates require recompiling the model
## Start sampling
k3 <- kfold(model3,K=10)
## Fitting model 1 out of 10
## The desired updates require recompiling the model
## Start sampling
## Fitting model 2 out of 10
## The desired updates require recompiling the model
## Start sampling
## Fitting model 3 out of 10
## The desired updates require recompiling the model
## Start sampling
## Fitting model 4 out of 10
## The desired updates require recompiling the model
## Start sampling
## Fitting model 5 out of 10
## The desired updates require recompiling the model
## Start sampling
## Fitting model 6 out of 10
## The desired updates require recompiling the model
```

```
## Start sampling
## Fitting model 7 out of 10
## The desired updates require recompiling the model
## Start sampling
## Fitting model 8 out of 10
## The desired updates require recompiling the model
## Start sampling
## Fitting model 9 out of 10
## The desired updates require recompiling the model
## Start sampling
## Fitting model 10 out of 10
## The desired updates require recompiling the model
## Start sampling
k4 <- kfold(model4,K=10)
## Fitting model 1 out of 10
## The desired updates require recompiling the model
## Start sampling
## Fitting model 2 out of 10
## The desired updates require recompiling the model
## Start sampling
## Fitting model 3 out of 10
## The desired updates require recompiling the model
## Start sampling
## Fitting model 4 out of 10
## The desired updates require recompiling the model
## Start sampling
## Fitting model 5 out of 10
## The desired updates require recompiling the model
## Start sampling
## Fitting model 6 out of 10
## The desired updates require recompiling the model
## Start sampling
## Fitting model 7 out of 10
## The desired updates require recompiling the model
## Start sampling
## Fitting model 8 out of 10
```

```
## The desired updates require recompiling the model
## Start sampling
## Fitting model 9 out of 10
## The desired updates require recompiling the model
## Start sampling
## Fitting model 10 out of 10
## The desired updates require recompiling the model
## Start sampling
k5 <- kfold(model5,K=10)
## Fitting model 1 out of 10
## The desired updates require recompiling the model
## Start sampling
## Fitting model 2 out of 10
## The desired updates require recompiling the model
## Start sampling
## Fitting model 3 out of 10
## The desired updates require recompiling the model
## Start sampling
## Fitting model 4 out of 10
## The desired updates require recompiling the model
## Start sampling
## Fitting model 5 out of 10
## The desired updates require recompiling the model
## Start sampling
## Fitting model 6 out of 10
## The desired updates require recompiling the model
## Start sampling
## Fitting model 7 out of 10
## The desired updates require recompiling the model
## Start sampling
## Fitting model 8 out of 10
## The desired updates require recompiling the model
## Start sampling
## Fitting model 9 out of 10
## The desired updates require recompiling the model
## Start sampling
```



```
## Fitting model 10 out of 10
## The desired updates require recompiling the model
## Start sampling
k6 <- kfold(model6,K=10)
## Fitting model 1 out of 10
## The desired updates require recompiling the model
## Start sampling
## Fitting model 2 out of 10
## The desired updates require recompiling the model
## Start sampling
## Fitting model 3 out of 10
## The desired updates require recompiling the model
## Start sampling
## Fitting model 4 out of 10
## The desired updates require recompiling the model
## Start sampling
## Fitting model 5 out of 10
## The desired updates require recompiling the model
## Start sampling
## Fitting model 6 out of 10
## The desired updates require recompiling the model
## Start sampling
## Fitting model 7 out of 10
## The desired updates require recompiling the model
## Start sampling
## Fitting model 8 out of 10
## The desired updates require recompiling the model
## Start sampling
## Fitting model 9 out of 10
## The desired updates require recompiling the model
## Start sampling
## Fitting model 10 out of 10
## The desired updates require recompiling the model
## Start sampling
```

K-fold information criterion for each model. The lowest value indicates the best model fit.

```
k1$kfoldic
```

```
## [1] 150.1088
```

```
k2$kfoldic
```

```
## [1] 150.9112
```

```
k3$kfoldic
```

```
## [1] 156.6812
```

```
k4$kfoldic
```

```
## [1] 154.0561
```

```
k5$kfoldic
```

```
## [1] 156.6449
```

```
k6$kfoldic
```

```
## [1] 154.7448
```
